# Supplementary material for: 24-Epibrassinolide Facilitates Adventitious Root Formation by Coordinating Cell-Wall Polyamine Oxidase- and Plasma Membrane Respiratory Burst Oxidase Homologue-Derived Reactive Oxygen Species in Capsicum annuum L.
Source: MDPI journal article supplement (doi:10.3390/antiox12071451), 2023-07-19
Supplement: s1 [file s1]

## Supplementary materials

**Table S1.** Information of *PAO* and *RBOH* genes for phylogenetic analysis. Different lowercase letters indicated that the values were significantly different among different treatments ( $p < 0.05$ ).

**Table S2.** List of primers for qRT-PCR in this study.

**Table S3.** List of primers for plasmid construction in this study.

**Table S4.** List of genes involved in pepper AR formation.

**Figure S1.** Effects of KI, DMTU, MDL72527, 2-HEH or DPI on AR formation in pepper hypocotyls.

**Figure S2.** Effects of EBL on the activities of cytoplasmic PAO (CP-PAO) during AR formation in pepper hypocotyls.

**Figure S3.** Phylogenetic relationship, functional domains, and gene structure of *CaPAOs*. **(A)** Phylogenetic relationship among gene structures of *CaPAOs*. **(B)** Distribution of conserved functional domains in *CaPAO* proteins.

**Figure S4.** Phylogenetic relationship, functional domains, and gene structure of *CaRBOHs*. **(A)** Phylogenetic relationship among gene structures of *CaRBOHs*. **(B)** Distribution of conserved functional domains in *CaRBOH* proteins.

**Figure S5.** Domain structure and sequence alignment of *CaRBOH* proteins. **(A)** Schematic representation of the *CaRBOH* proteins with the respective functional domains, including EF-hands, transmembrane domains (TMs) and flavin adenine dinucleotide (FAD)-binding sites. **(B)** Sequence alignment of seven *CaRBOH* proteins. EF-hand domains are indicated by orange boxes. Conserved FAD-binding site are indicated by green box. Putative transmembrane domains predicted by TMHMM2.0 (<https://services.healthtech.dtu.dk/service.php?TMHMM-2.0>) are indicated by blue boxes.

**Figure S6.** Phenotypes of the VIGS seedlings. **(A)** The top- and side-view of the control (*TRV2:00*) and PDS-silenced pepper plants (*TRV2:PDS*). **(B)** The side-view of *CaPAO1*- and *CaRBOH*-silenced pepper plants.

**Table S1. Information of *PAO* and *RBOH* genes for phylogenetic analysis**

| Species                     | <i>PAO</i> family |                | <i>RBOH</i> family |                |
|-----------------------------|-------------------|----------------|--------------------|----------------|
|                             | Gene name         | Accession No.  | Gene name          | Accession No.  |
| <i>Arabidopsis thaliana</i> | <i>AtPAO1</i>     | At5g13700      | <i>AtRBOHA</i>     | At5g07390      |
|                             | <i>AtPAO2</i>     | At2g43020      | <i>AtRBOHB</i>     | At1g09090      |
|                             | <i>AtPAO3</i>     | At3g59050      | <i>AtRBOHC</i>     | At5g51060      |
|                             | <i>AtPAO4</i>     | At1g65840      | <i>AtRBOHD</i>     | At5g47910      |
|                             | <i>AtPAO5</i>     | At4g29720      | <i>AtRBOHE</i>     | At1g19230      |
|                             | <i>AtPAO6</i>     | At1g62830      | <i>AtRBOHF</i>     | At1g64060      |
|                             | <i>AtPAO7</i>     | At3g13682      | <i>AtRBOHG</i>     | At4g25090      |
|                             | <i>AtPAO8</i>     | At4g16310      | <i>AtRBOHH</i>     | At5g60010      |
|                             | <i>AtPAO9</i>     | At3g10390      | <i>AtRBOHI</i>     | At4g11230      |
|                             |                   |                | <i>AtRBOHJ</i>     | At3g45810      |
| <i>Solanum lycopersicum</i> | <i>SlPAO1</i>     | Solyc01g087590 | <i>SlRBOH1</i>     | Solyc06g068680 |
|                             | <i>SlPAO2</i>     | Solyc07g043590 | <i>SlRBOH2</i>     | Solyc03g117980 |
|                             | <i>SlPAO3</i>     | Solyc12g006370 | <i>SlRBOH3</i>     | Solyc01g099620 |
|                             | <i>SlPAO4</i>     | Solyc02g081390 | <i>SlRBOH4</i>     | Solyc05g025680 |
|                             | <i>SlPAO5</i>     | Solyc03g031880 | <i>SlRBOH5</i>     | Solyc07g042460 |
|                             | <i>SlPAO6</i>     | Solyc05g018880 | <i>SlRBOH6</i>     | Solyc06g075570 |
|                             | <i>SlPAO7</i>     | Solyc07g039310 | <i>SlRBOH7</i>     | Solyc11g072800 |
|                             | <i>SlPAO8</i>     | Solyc12g008850 | <i>SlRBOH8</i>     | Solyc08g081690 |
|                             | <i>SlPAO9</i>     | Solyc07g063450 |                    |                |
|                             | <i>SlPAO10</i>    | Solyc07g063500 |                    |                |
|                             | <i>SlPAO11</i>    | Solyc04g081100 |                    |                |
| <i>Capsicum annuum</i>      | <i>CaPAO1</i>     | LOC107858653   | <i>CaRBOH1</i>     | LOC107875997   |
|                             | <i>CaPAO2</i>     | LOC107878076   | <i>CaRBOH2</i>     | LOC107862088   |
|                             | <i>CaPAO3</i>     | LOC107841896   | <i>CaRBOH3</i>     | LOC107839607   |
|                             | <i>CaPAO4</i>     | LOC107859655   | <i>CaRBOH5</i>     | LOC107877834   |
|                             | <i>CaPAO5</i>     | LOC107870798   | <i>CaRBOH6</i>     | LOC107875569   |
|                             | <i>CaPAO8</i>     | LOC107840963   | <i>CaRBOH7</i>     | LOC107846897   |
|                             | <i>CaPAO10</i>    | LOC107878694   | <i>CaRBOH8</i>     | LOC107864242   |
|                             | <i>CaPAO11</i>    | LOC107866910   |                    |                |

**Table S2. List of primers for qRT-PCR in this study.**

| <b>Primer name</b> | <b>Primer sequences (5'-3')</b> |
|--------------------|---------------------------------|
| qCaPAO1-F          | AGTGGAATAGCAGCGGACTC            |
| qCaPAO1-R          | CGTTTTTGGTGTACTGGCTGG           |
| qCaPAO2-F          | GCTGAGGCTTCACCATCTGT            |
| qCaPAO2-R          | GCTGAGGCTTCACCATCTGT            |
| qCaPAO3-F          | GGAAGGAGGTCTGTGGCAA             |
| qCaPAO3-R          | GCATCATGAAGTGTGCGAGC            |
| qCaPAO4-F          | GAGTTGAGGCAAGAAGGGCT            |
| qCaPAO4-R          | CATGGCCACCAGTGAGAACT            |
| qCaPAO5-F          | GGCAGTCTGATGACCACCAA            |
| qCaPAO5-R          | TTAGGACCCCAAGCGACAC             |
| qCaPAO8-F          | GACGCGAAGTTGAACAACCC            |
| qCaPAO8-R          | TTGTTGTCGAGACCCCTTCG            |
| qCaRBOH1-F         | TTGTGTTTGTGTGCGCAAGG            |
| qCaRBOH1-R         | GCCACCGCCATCATTTTGTG            |
| qCaRBOH2-F         | TGTTTGTCAACTGTGCTGCG            |
| qCaRBOH2-R         | GGTGGTTGGCAAACCTCAGA            |
| qCaRBOH3-F         | AGGCGATTGGACATCTCAGC            |
| qCaRBOH3-R         | AGAGCTTTGGCAATCTAGGCT           |
| qCaRBOH5-F         | TCTGGCAGTGGTGTATGTGC            |
| qCaRBOH5-R         | TCCTGGAAGTACAGAAACCTTCA         |
| qCaRBOH6-F         | GCAGTCTCCCCACTAGAACC            |
| qCaRBOH6-R         | TCGCCCTCTTTCCCTGTAGT            |
| qCaRBOH7-F         | GGGTTCAAGAGCCTGCATT             |
| qCaRBOH7-R         | CAAATTCCTTGCTTTCCATTCCTAT       |
| qCaRBOH8-F         | TGCAACAAGCGAACAACCAG            |
| qCaRBOH8-R         | TCTCGATGACTCCCCGTTGA            |
| qCaLBD16-F         | CCGTTTCCTAGTCTGCTCGT            |
| qCaLBD16-R         | TTGCATGCACCACAAGGTGA            |
| qCaLBD29-F         | AGCAGCAGCTCAAACTTGC             |
| qCaLBD29-R         | TGGGGCATAGTGCTTGGATT            |
| qCaCYCD3;1-F       | GTCATGTGGTGGGTAGCACT            |
| qCaCYCD3;1-R       | TGCAATCCACCAGCTAACCA            |
| qCaCDKA1-F         | CATACTCAAAGAGTCCATCCAGC         |
| qCaCDKA1-R         | TCCACGATCACGAGCTTTGT            |
| qCaCDKD3-F         | GGCCGCTGCATGTATCTTTG            |
| qCaCDKD3-R         | ACTGTGAAGGCTTTGGGGTC            |
| qCaUBI3-F          | TGTCCATCTGCTCTCTGTTG            |
| qCaUBI3-R          | CACCCCAAGCACAATAAGAC            |

**Table S3. List of primers for plasmid construction in this study.**

| Primer name                                            | Primer sequences (5'-3')                         |
|--------------------------------------------------------|--------------------------------------------------|
| <b>1. Construction of VIGS vectors</b>                 |                                                  |
| TRV2-CaPAO1-F                                          | gtgagtaagggtaccgaattcAATATCTTCCCACTGTGATCATAGATG |
| TRV2-CaPAO1-R                                          | cgtgagctcggtagcgatccTCGCTCCTCTGTAATCATCGTCG      |
| TRV2-CaRBOH2-F                                         | gtgagtaagggtaccgaattcTTAGCCAATAAAGCCAACCTCCG     |
| TRV2-CaRBOH2-R                                         | cgtgagctcggtagcgatccATGCAGAATTCGGAAAATCATCA      |
| TRV2-CaRBOH5-F                                         | gtgagtaagggtaccgaattcAGCTTCTTCTTCGCCTTCATCA      |
| TRV2-CaRBOH5-R                                         | cgtgagctcggtagcgatccATGCAGCTGAAATCATTCTTGAGG     |
| TRV2-CaRBOH6-F                                         | gtgagtaagggtaccgaattcATTTCGTGGTACAACCTCCACTCCTT  |
| TRV2-CaRBOH6-R                                         | cgtgagctcggtagcgatccGCACTATGGTTTTTAAAAACGTTGTAT  |
| <b>2. Construction of transient expression vectors</b> |                                                  |
| 2300-CaPAO1-F                                          | tatgaccatgattacgaattcATGCAGAATTCGGAAAATCATCA     |
| 2300-CaPAO1-R                                          | caggtcgactctagaggatccTCAAAAATTTCTTTATGGAAATCAAA  |
| 2300-CaRBOH2-F                                         | tatgaccatgattacgaattcATGCAGAATTCGGAAAATCATCA     |
| 2300-CaRBOH2-R                                         | caggtcgactctagaggatccTCAAAAATTTCTTTATGGAAATCAAA  |
| 2300-CaRBOH5-F                                         | tatgaccatgattacgaattcATGCAGCTGAAATCATTCTTGAGG    |
| 2300-CaRBOH5-R                                         | caggtcgactctagaggatccTCATACCCGAGTGCCAGACAG       |
| 2300-CaRBOH6-F                                         | tatgaccatgattacgaattcATGGTGCCCATGACAATGG         |
| 2300-CaRBOH6-R                                         | caggtcgactctagaggatccCTAGAAATTTCTTTGTGGAAATTGAA  |

**Table S4. List of genes involved in pepper AR formation**

| Gene name        | Accession No. |
|------------------|---------------|
| <i>CaLBD29</i>   | LOC107853240  |
| <i>CaLBD16</i>   | LOC107853239  |
| <i>CaCYCD3;1</i> | LOC107840237  |
| <i>CaCDKA-1</i>  | LOC107850646  |
| <i>CaCDKD-3</i>  | LOC107864765  |

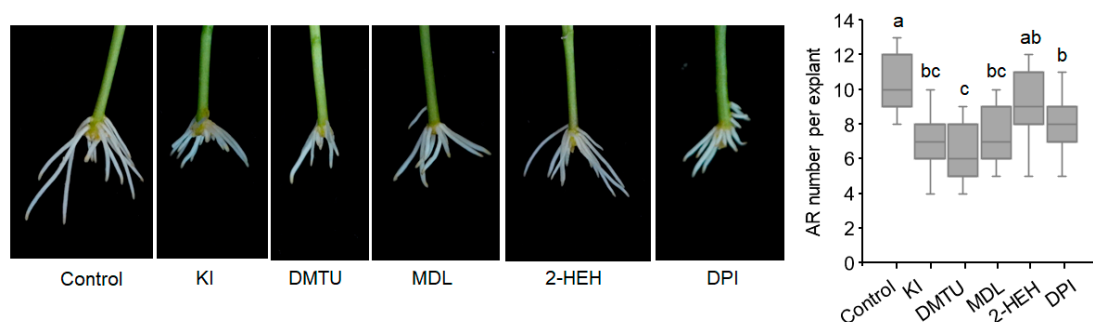

**Figure S1.** Effects of KI, DMTU, MDL72527, 2-HEH or DPI on AR formation in pepper hypocotyls. Different lowercase letters indicated that the values were significantly different among different treatments ( $p < 0.05$ ).

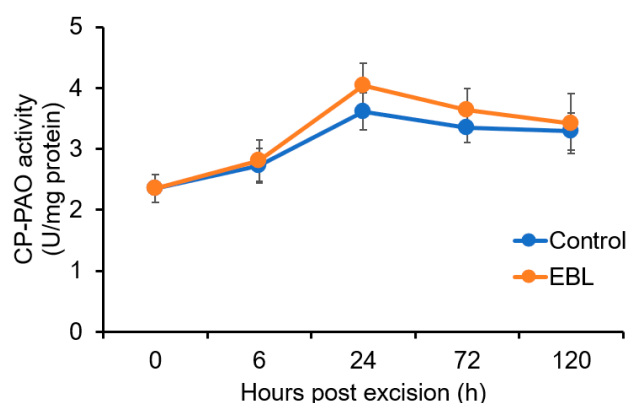

**Figure S2.** Effects of EBL on the activities of cytoplasmic PAO (CP-PAO) during AR formation in pepper hypocotyls.

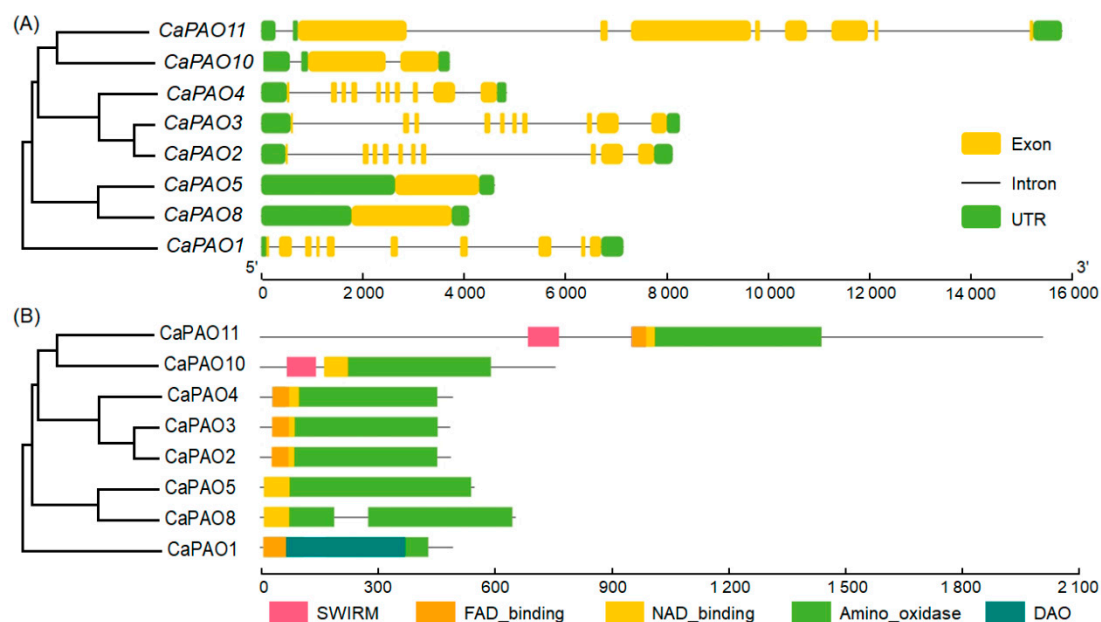

**Figure S3.** Phylogenetic relationship, functional domains, and gene structure of *CaPAOs*. (A) Phylogenetic relationship among gene structures of *CaPAOs*. (B) Distribution of conserved functional domains in *CaPAO* proteins.

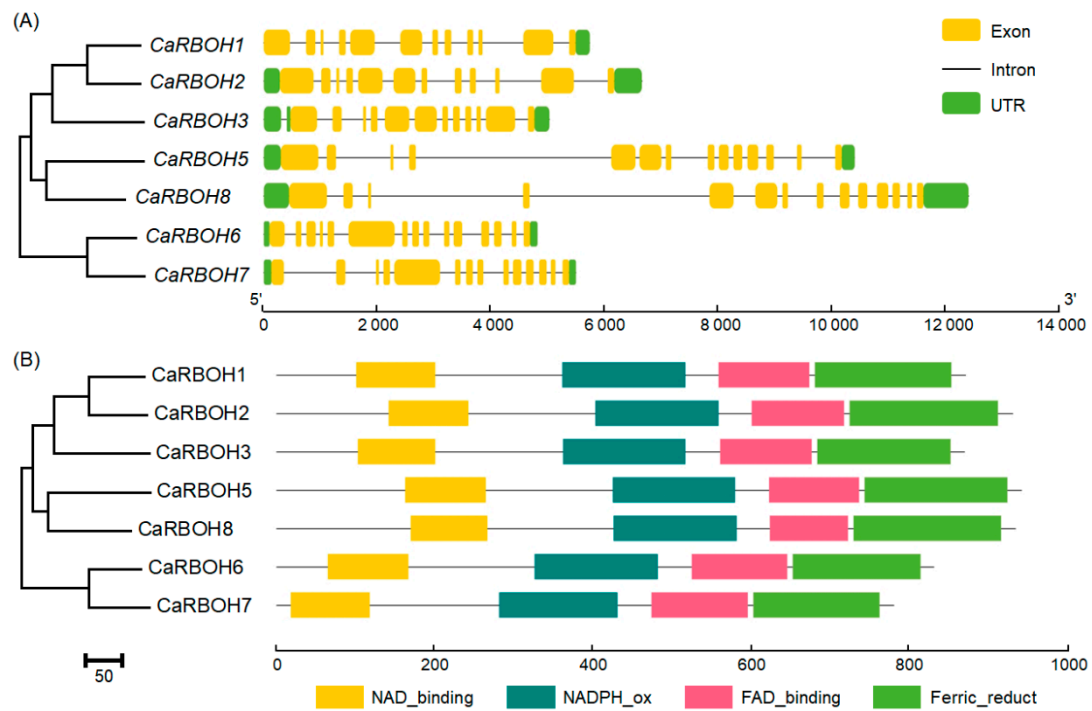

**Figure S4.** Phylogenetic relationship, functional domains, and gene structure of *CaRBOHs*. **(A)** Phylogenetic relationship among gene structures of *CaRBOHs*. **(B)** Distribution of conserved functional domains in *CaRBOH* proteins.

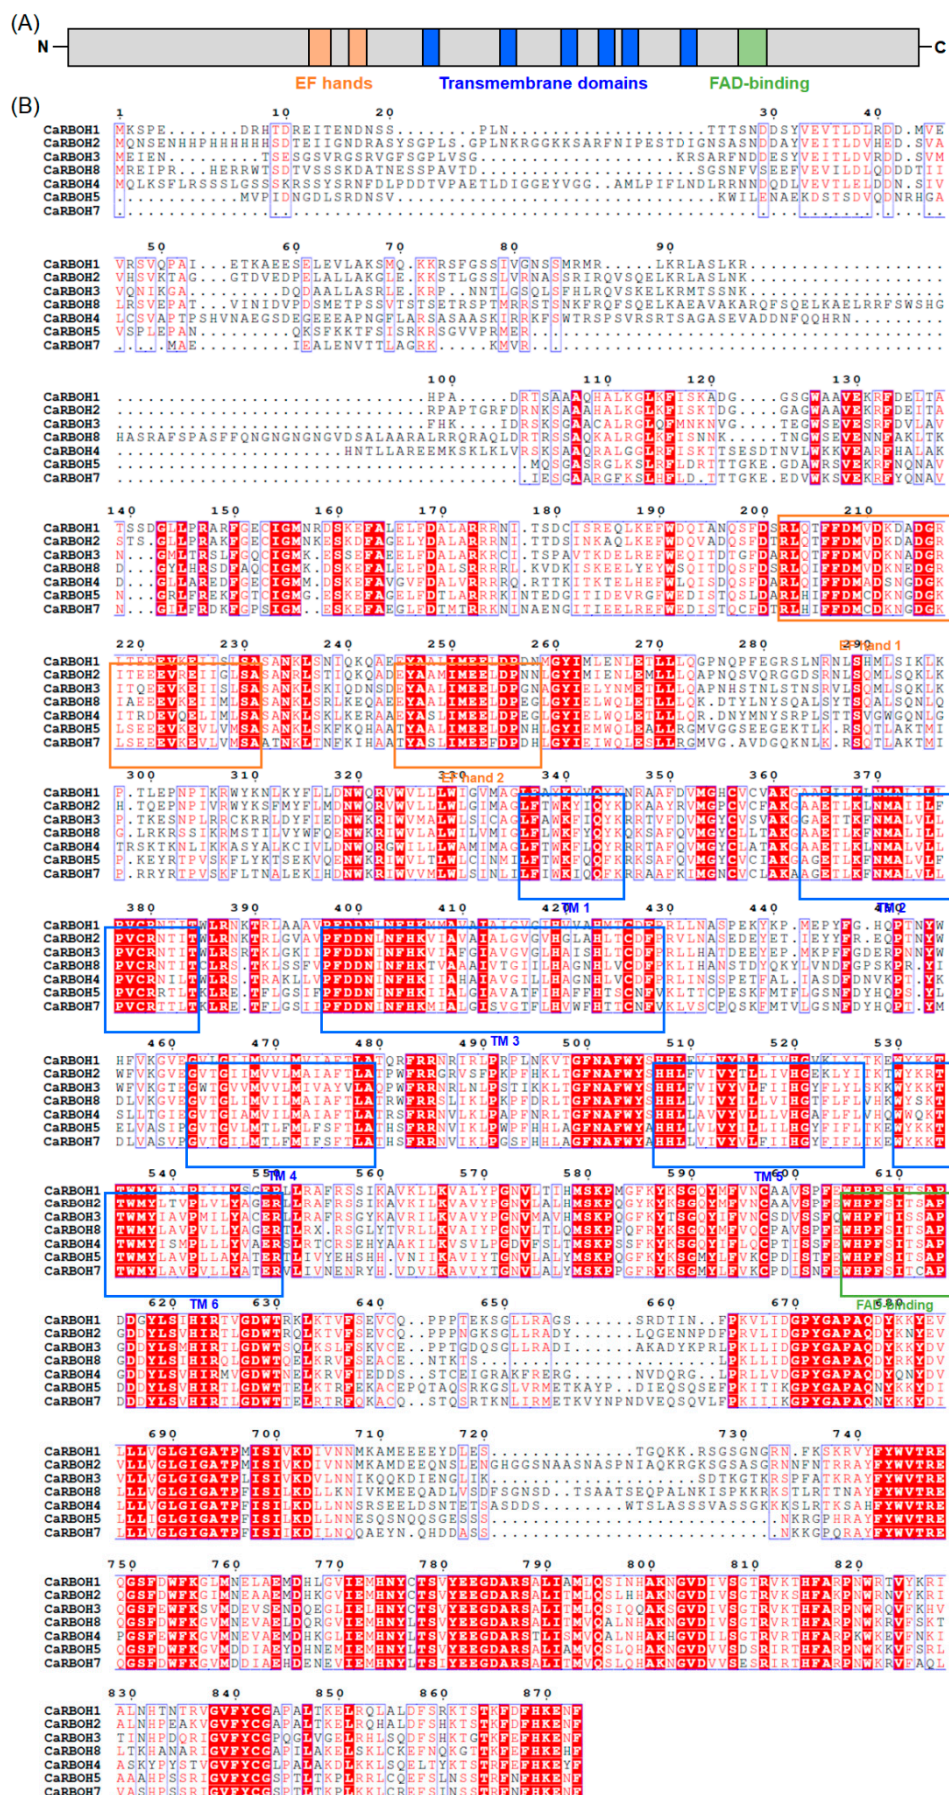

**Figure S5.** Domain structure and sequence alignment of CaRBOH proteins. (A) Schematic representation of the CaRBOH proteins with the respective functional domains, including EF-hands, transmembrane domains (TMs) and flavin adenine dinucleotide (FAD)-binding sites. (B) Sequence alignment of seven CaRBOH proteins. EF-hand domains are indicated by orange boxes. Conserved FAD-binding site are indicated by green box. Putative transmembrane domains predicted by TMHMM2.0 (<https://services.healthtech.dtu.dk/service.php?TMHMM-2.0>, accessed on 15 March 2023) are indicated by blue boxes.

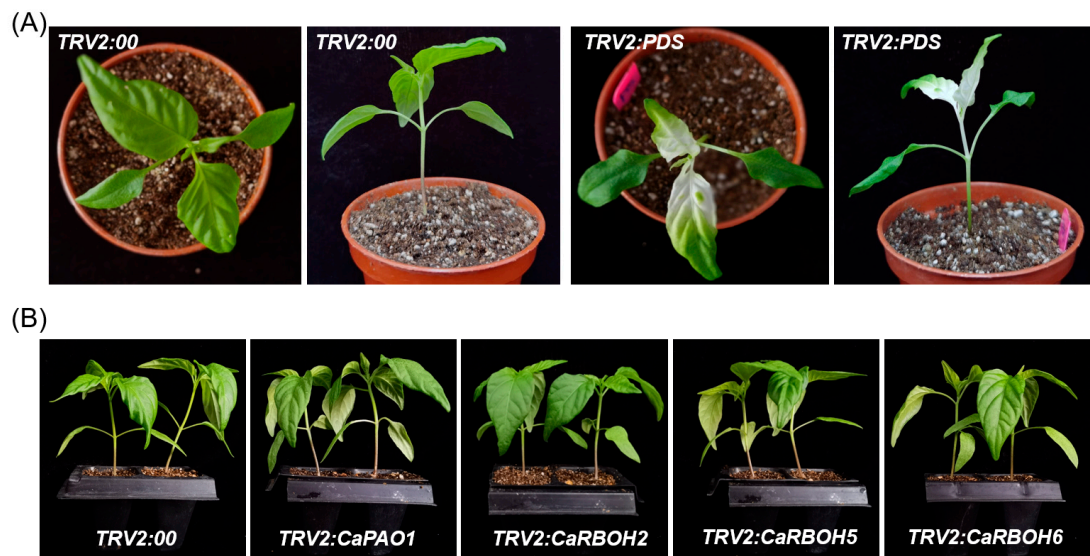

**Figure S6.** Phenotypes of the VIGS seedlings. **(A)** The top- and side-view of the control (*TRV2:00*) and PDS-silenced pepper plants (*TRV2:PDS*). **(B)** The side-view of *CaPAO1*- and *CaRBOH*-silenced pepper plants.
